# Supplementary material
Source: PubMed Central journal article supplement (PMC4247564)
Supplement: supp_tpc.114.127563_TPC127563_SupplementalData.pdf [file supp_tpc.114.127563_TPC127563_SupplementalData.pdf]

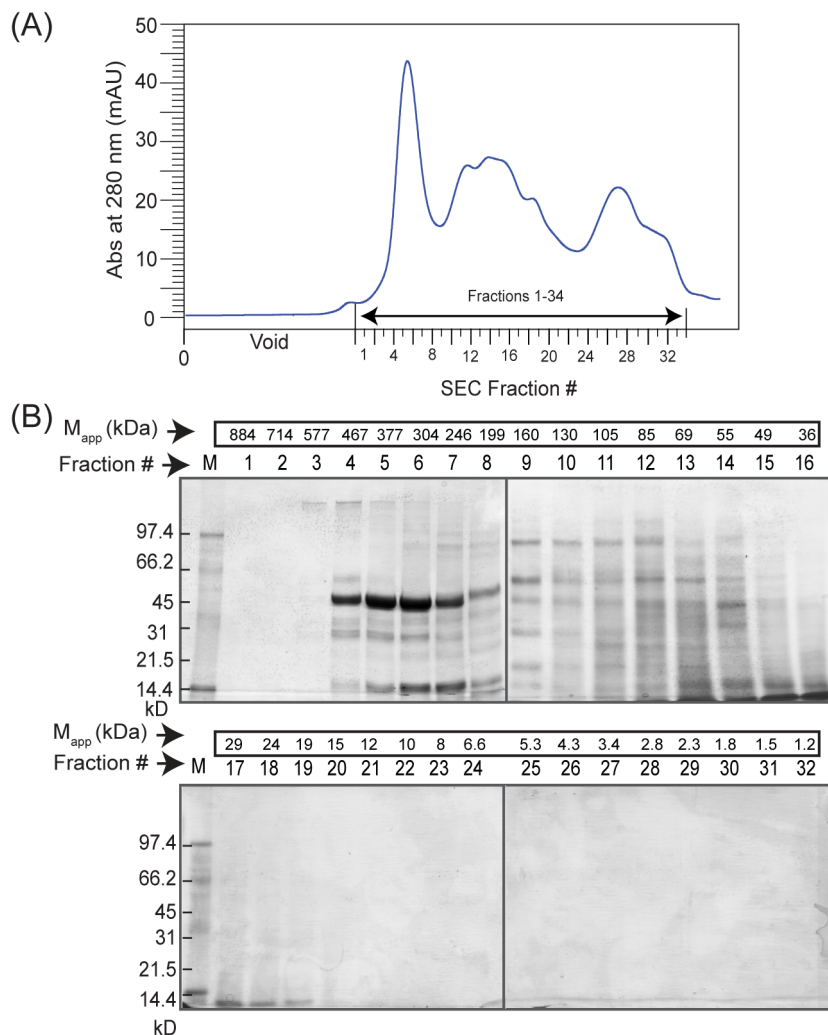

**Supplemental Figure 1.** SDS-PAGE analysis of SEC fractions obtained from leaf cytosol. (A) The UV chromatogram of biological replicate 2 showing profile of Arabidopsis leaf cytosol. Crude cytosol containing 1.5 mg protein was separated into 34 fractions of 0.5 ml each using Superdex 200 (300 mm  $\times$  10 mm) SEC column. Absorbance of eluted proteins was monitored at 280 nM as a function of fraction number. Fraction 1 is the void. Proteins in fractions 1-34 were subjected to LC-MS/MS analysis. Protein standards (669-29 kDa - thyroglobulin, apoferritin,  $\beta$ -amylase, alcohol dehydrogenase, bovine serum albumin and carbonic anhydrase) were used to generate a standard curve for calculation of apparent mass ( $M_{app}$ ) of each identified protein. (B) SDS-PAGE separation of proteins in each SEC fraction. Equal volume (10  $\mu$ l) of denatured and concentrated proteins from each fraction were resolved in 10% gels and stained with Coomassie blue. The  $M_{app}$  of proteins eluting in each fraction is shown on the top of each gel and was determined based on calibration equation generated based on the peak elution volume of the protein standards.

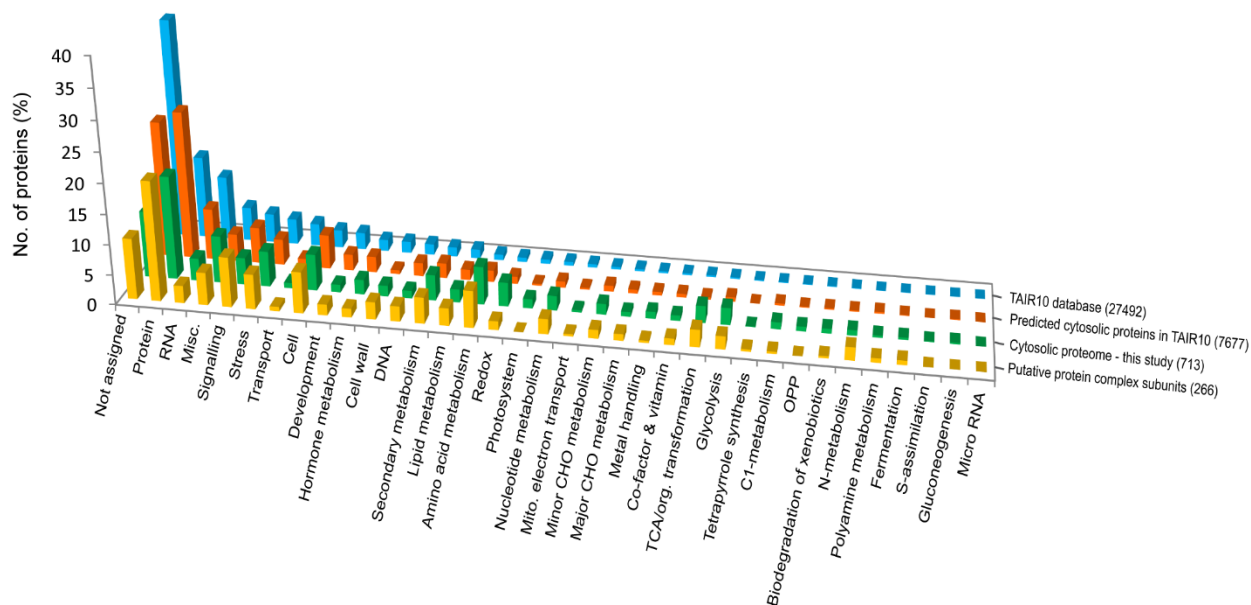

**Supplemental Figure 2.** Functional categories of total, predicted cytosolic proteins, and our experimentally analyzed cytosolic proteins. The 713 proteins that survived our filtering criteria including 266 putative protein complex subunits were analyzed for functions as outlined by MapMan code (Thimm et al., 2004) and compared with the putative cytosolic proteins from the TAIR10 protein database (7677 proteins) as well as the whole TAIR10 protein database. Putative cytosolic proteins in the whole TAIR10 database were predicted based on SUBA database (Heazlewood et al., 2007) followed by HMMTOP TMD prediction program (Tusnady and Simon, 1998) for any transmembrane domain containing proteins, and then TargetP analysis (Emanuelsson et al., 2007). The highest number of cytosolic proteins belong to protein synthesis, degradation, folding and post-translation modification which are grouped together as “protein”. Of 713 proteins, 78 were functionally unassigned or unknown, of which 29 are predicted to exist in protein complexes.

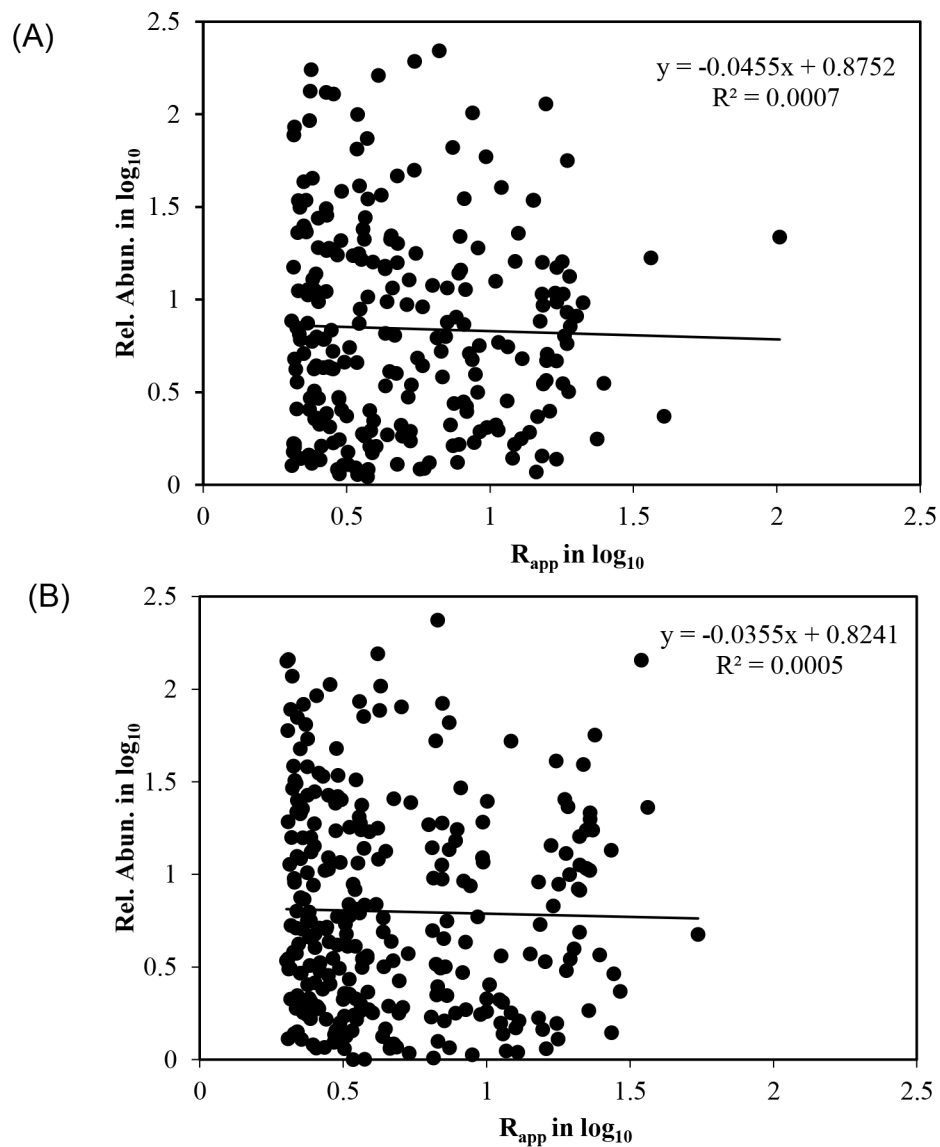

**Supplemental Figure 3.** Scatter plots of  $R_{app}$  and relative abundances of putative protein complexes in biological replicates 1 (A) and 2 (B). Data were plotted on a log scale. There was no correlation between relative abundance and likelihood of proteins complex formation. Rel. Abun., relative abundance.

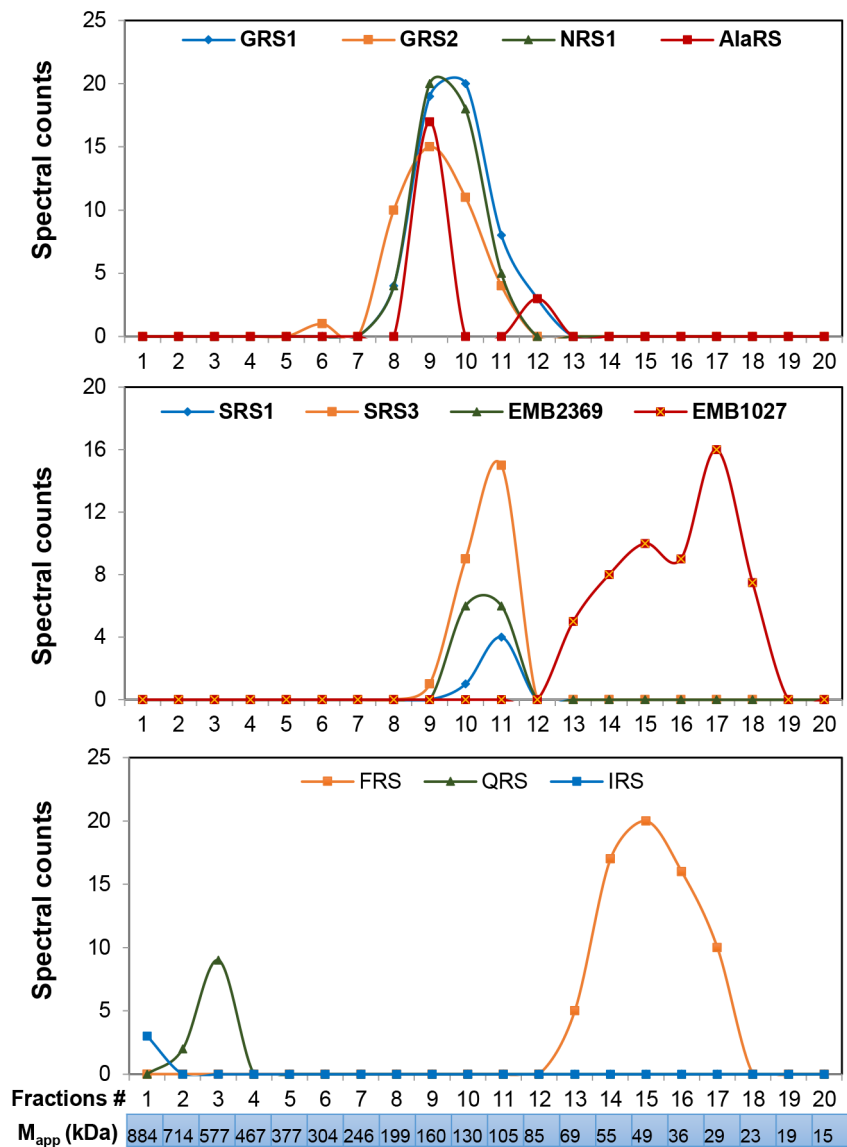

**Supplemental Figure 4.** Elution profiles of aminoacyl t-RNA synthetases. GRS1, *GLYCYL-tRNA SYNTHETASE1* (AT1G29880); GRS2, *GLYCYL-tRNA SYNTHETASE2* (AT3G48110); NRS1, *ASPARAGINYL-tRNA SYNTHETASE1* (AT5G56680); AlaRS, *ALANYL-tRNA SYNTHETASE* (AT1G50200); SRS1, *SERYL-tRNA SYNTHETASE1* (AT5G27470); SRS3, *SERYL-tRNA SYNTHETASE3*; EMB2369, *EMBRYO DEFECTIVE 2369* (AT4G04350); EMB1027, *EMBRYO DEFECTIVE 1027* (AT4G26300); FRS, *PHENYLALANYL-tRNA SYNTHETASE* (AT3G58140); QRS, *GLUTAMINYL-tRNA SYNTHETASE* (AT5G26710). The apparent mass of each SEC fraction is indicated below the x-axis. The elution profiles of IRS and QRS showed an obvious quaternary structure.

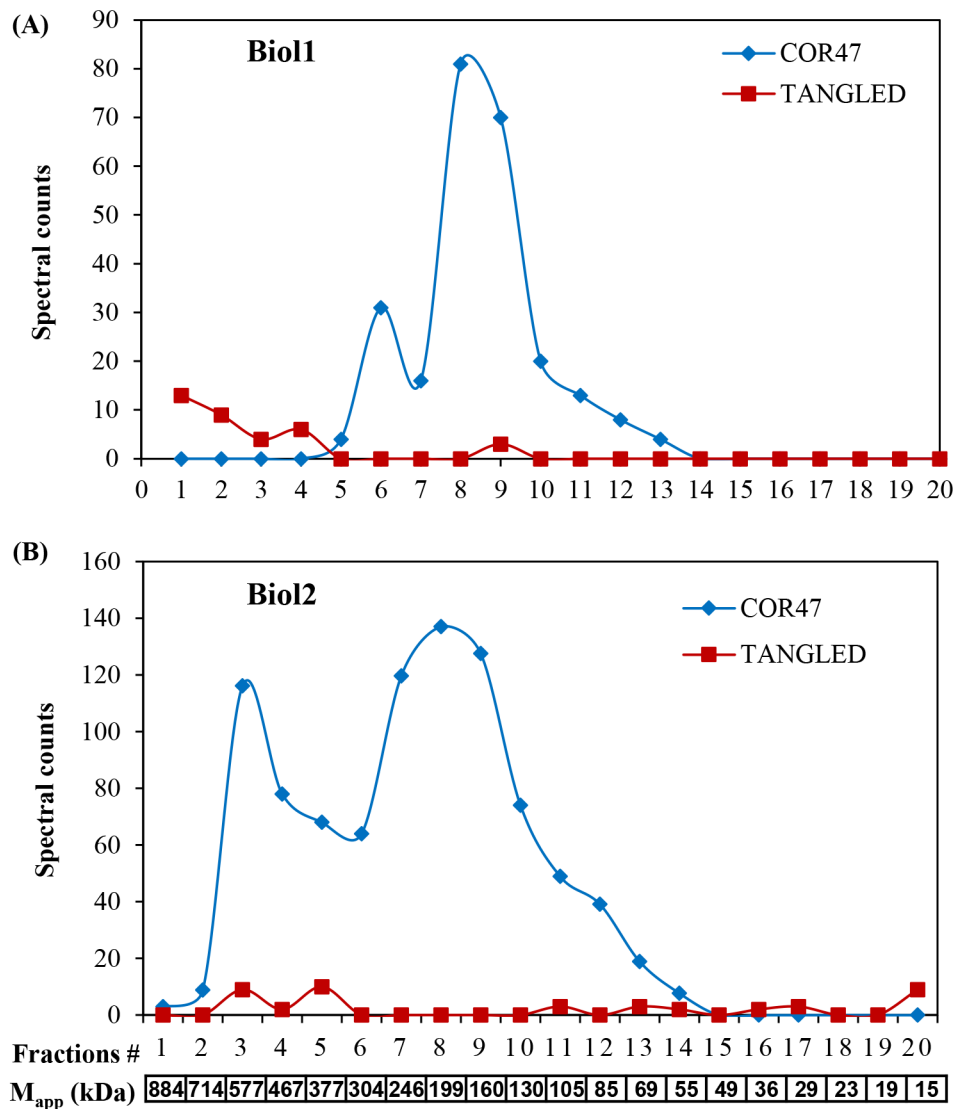

**Supplemental Figure 5.** Elution profiles of dehydrin COR47 (AT1G20440) and TANGLED (AT3G05330) on the SEC column in (A) biological replicate 1 and (B) biological replicate 2. The approximate mass of each SEC fraction is indicated below the x-axis. Both proteins were reproducibly identified as putative protein complexes.

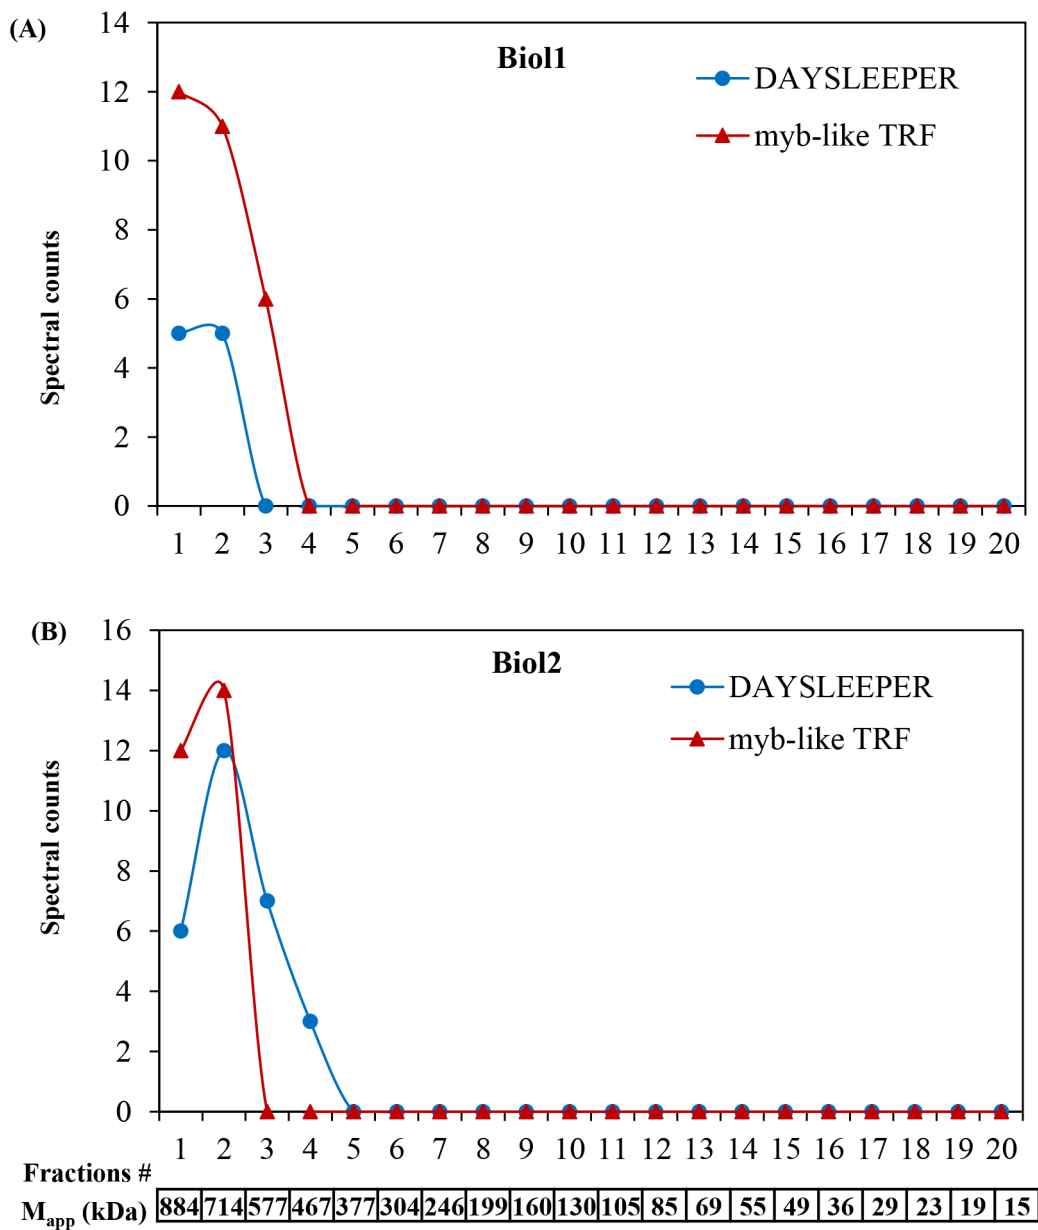

**Supplemental Figure 6.** Elution profiles of hAT-family transposase DAYSLEER (AT3G42170), and myb-like TRF transcription factor (AT1G58220) in (A) biological replicate 1 and (B) biological replicate 2. The approximate mass of each SEC fraction is indicated below the x-axis. Both proteins were reproducibly identified in higher mass fractions likely indicating their presence in large protein complexes.

## SUPPLEMENTAL REFERENCES

Emanuelsson, O., Brunak, S., von Heijne, G., and Nielsen, H. (2007). Locating proteins in the cell using TargetP, SignalP and related tools. *Nat Protoc* 2, 953-971.

Heazlewood, J.L., Verboom, R.E., Tonti-Filippini, J., Small, I., and Millar, A.H. (2007). SUBA: The Arabidopsis subcellular database. *Nucleic Acids Res* 35, D213-D218.

Thimm, O., Blasing, O., Gibon, Y., Nagel, A., Meyer, S., Kruger, P., Selbig, J., Muller, L.A., Rhee, S.Y., and Stitt, M. (2004). MAPMAN: a user-driven tool to display genomics data sets onto diagrams of metabolic pathways and other biological processes. *Plant J* 37, 914-939.

Tusnady, G.E., and Simon, I. (1998). Principles governing amino acid composition of integral membrane proteins: application to topology prediction. *J Mol Biol* 283, 489-506.

**Supplemental Table 1. Comparison of the apparent protein masses ( $M_{app}$ ) determined from the current study with the published complex masses in the literature ( $M_{ref}$ ) determined based on gel filtration chromatography. Biol1, biological replicate 1; Biol2, biological replicate 2; Ref.; references**

| Protein Name                          | Symbol                                                   | $M_{mono}$<br>(kDa) | $M_{app}$ (kDa)<br>Biol1 | $M_{app}$ (kDa)<br>Biol2 | $M_{ref}$ (kDa)       | Organism                          | Ref.               |
|---------------------------------------|----------------------------------------------------------|---------------------|--------------------------|--------------------------|-----------------------|-----------------------------------|--------------------|
| Alcohol dehydrogenase                 | ADH (At1g77120)                                          | 41.8                | 84.9                     | 84.9                     | 80 (dimer)            | Horse liver                       | <sup>1</sup>       |
| Aldehyde dehydrogenase                | ALDH (At3g48000)                                         | 58.9                | 199                      | 161                      | 200 (tetramer)        | Arabidopsis                       | <sup>2</sup>       |
| UDP-D xylose synthase                 | AXS1 (At1g08200),<br>AXS2 (At1g08200)                    | 44.2                | 105                      | 105                      | 91.6 (dimer)          | Arabidopsis                       | <sup>3</sup>       |
| UDP-D-galactose 4-epimerase 1         | UGE1 (At1g12780)                                         | 39.4                | 68.7                     | 68.7                     | 83 (dimer)            | Arabidopsis                       | <sup>4</sup>       |
| Enolase                               | ENOC (At2g29560)                                         | 52                  | 105                      | 105                      | 100 (dimer)           | <i>Plasmodium falciparum</i>      | <sup>5</sup>       |
| Cytosolic enolase                     | ENO2 (At2g36530)                                         | 47.9                | 68.7                     | 68.7                     | 80 (dimer)            | Human                             | <sup>6</sup>       |
| PEP carboxylase                       | PEPC1 (At1g53310),<br>PEPC3 (At3g14940)                  | 110                 | 377                      | 377                      | 440 (tetramer)        | <i>E. coli</i>                    | <sup>7</sup>       |
| Glutamate decarboxylase               | GAD5 (At3g17760)                                         | 56.2                | 130                      | 304.9                    | 115                   | <i>E. coli</i>                    | <sup>8</sup>       |
| Aspartate aminotransferase            | ASP3 (At5g11520)                                         | 49.1                | 84.9                     | 84.9                     | 92.7                  | Porcine heart                     | <sup>9</sup>       |
| COP1-interactive protein 1            | CIP1 (At5g41790)                                         | 182                 | 714                      | 884                      | 700                   | Arabidopsis                       | <sup>10</sup>      |
| Sucrose synthase                      | SUS1 (At5g20830)                                         | 92.3                | 246                      | 246                      | 360                   | Arabidopsis                       | <sup>11</sup>      |
| Calmodulin 4                          | CAM4 (At1g66410)                                         | 17.8                | 44.8                     | 44.8                     | 36 (dimer)            | Bovine                            | <sup>12</sup>      |
| S-phase kinase-associated protein 1   | SKP1 (At1g75950)                                         | 17.8                | 84.9                     | 68.6                     | 90.4                  | <i>E. coli</i>                    | <sup>13</sup>      |
| Pyridoxine biosynthesis 1.1           | PDX1:1 (At2g38230)                                       | 32.8                | 376.9                    | 376.9                    | 750                   | Arabidopsis                       | <sup>14</sup>      |
| Glutamate decarboxylase 2             | GAD2 (At1g65960)                                         | 56.1                | 129.9                    | 160.8                    | 140                   | Porcine brain                     | <sup>15</sup>      |
| Acidic ribosomal family protein       | At2g27710                                                | 11.4                | 68.6                     | 84.9                     | ~80 (pentamer)        | Maize                             | <sup>16</sup>      |
| ATP-citrate lyase                     | ACLB-1 (At3g06650);<br>ACLB-2 (At5g49460)                | 65.8                | 466                      | 577                      | 550 (octamer)         | Arabidopsis                       | <sup>17</sup>      |
| Fructose biphosphate aldolase         | FBA6 At2g36460                                           | 38.4                | 130                      | 130                      | ~144 (tetramer)       | Rabbit                            | <sup>18</sup>      |
| Cytochrome C oxidase copper chaperone | Cox17 (At1g53030)                                        | 7.9                 | 12.5                     | 19.1                     | ~16-32 dimer/tetramer | Yeast                             | <sup>19, 19b</sup> |
| Adenosine kinase                      | ADK1 (At3g09820)<br>ADK2 (At5g03300)                     | 37.8                | 84.8                     | 84.8                     | ~70 (dimer)           | <i>Mycobacterium tuberculosis</i> | <sup>20</sup>      |
| Beta carbonic anhydrase               | BCA3 (At1g23730)<br>BCA4 (At1g70410)                     | 28.8                | 199                      | 199                      | 88 (tetramer)         | <i>Clostridium perfringens</i>    | <sup>21</sup>      |
| Alanine:glyoxylate aminotransferase   | AGT (At2g13360)                                          | 44.2                | 84.8                     | 104.7                    | dimer                 | Yeast                             | <sup>22</sup>      |
| Nitrilase                             | NIT1 (AT3G44310)<br>NIT2 (AT3G44300)<br>NIT3 (AT3G44320) | 38.1                | 577                      | 577                      | 600 ultimate)         | <i>Aspergillus niger</i>          | <sup>23</sup>      |
| Nitrilase                             | NIT4 (At5g44300)                                         | 38.8                | 466                      | 883                      | 600 ultimate)         | <i>Aspergillus niger</i>          | <sup>23</sup>      |
| Cell division cycle 48                | CDC48 (AT3G09840.1)                                      | 89.3                | 466                      | 577                      | hexamer               | Arabidopsis                       | <sup>24</sup>      |



### Supplemental Table 1 References

1. **Hammes-Schiffer, S., and Benkovic, S. J.** (2009). Relating protein motion to catalysis. *Ann. Rev. Biochem* **75**: 519-41.
2. **Wei, Y., Lin, M., Oliver, D. J., and Schnable, P. S.** (2009). The roles of aldehyde dehydrogenases (ALDHs) in the PDH bypass of Arabidopsis. *BMC Biochem.* **10**: 7.
3. **Molhoj, M., Verma, R., and Reiter, W. D.** (2003). The biosynthesis of the branched-chain sugar d-apiose in plants: functional cloning and characterization of a UDP-d-apiose/UDP-d-xylose synthase from Arabidopsis. *Plant J.* **35**: 693-703.
4. **Barber, C., Rosti, J., Rawat, A., Findlay, K., Roberts, K., and Seifert, G. J.** (2006). Distinct properties of the five UDP-D-glucose/UDP-D-galactose 4-epimerase isoforms of Arabidopsis thaliana. *J. Biol. Chem.* **281**: 17276-85.
5. **Pal-Bhowmick, I., Sadagopan, K., Vora, H. K., Sehgal, A., Sharma, S., and Jarori, G. K.** (2004). Cloning, over-expression, purification and characterization of Plasmodium falciparum enolase. *Eur. J. Biochem.* **271**: 4845-4854.
6. **Pancholi, V.** (2001). Multifunctional alpha-enolase: its role in diseases. *Cell. Mol. Life Sci.* **58**: 902-20.
7. **O'Leary, B., Rao, S. K., Kim, J., and Plaxton, W. C.** (2009). Bacterial-type phosphoenolpyruvate carboxylase (PEPC) functions as a catalytic and regulatory subunit of the novel class-2 PEPC complex of vascular plants. *J. Biol. Chem.* **284**: 24797-805.
8. **Dutyshev, D. I., Darii, E. L., Fomenkova, N. P., Pechik, I. V., Polyakov, K. M., Nikonov, S. V., Andreeva, N. S., and Sukhareva, B. S.** (2005). Structure of Escherichia coli glutamate decarboxylase (GADalpha) in complex with glutarate at 2.05 angstroms resolution. *Acta cryst. D.* **61**: 230-5.
9. **Rhee, S., Silva, M. M., Hyde, C. C., Rogers, P. H., Metzler, C. M., Metzler, D. E., and Arnone, A.** (1997). Refinement and comparisons of the crystal structures of pig cytosolic aspartate aminotransferase and its complex with 2-methylaspartate. *J. Biol. Chem.* **272**: 17293-302.
10. **Zhu, D., Maier, A., Lee, J. H., Laubinger, S., Saijo, Y., Wang, H., Qu, L. J., Hoecker, U., and Deng, X. W.** (2008). Biochemical characterization of Arabidopsis complexes containing CONSTITUTIVELY PHOTOMORPHOGENIC1 and SUPPRESSOR OF PHYA proteins in light control of plant development. *Plant Cell* **20**: 2307-23.
11. **Zheng, Y.; Anderson, S.; Zhang, Y.; Garavito, R. M.** (2011). The structure of sucrose synthase-1 from Arabidopsis thaliana and its functional implications. *J. Biol. Chem.* **286**: 36108-18.
12. **Taketa, S., Barnes, J. A., Ubhi, M., and Sharma, R. K.** (1995). High molecular weight calmodulin-binding protein is phosphorylated by calmodulin-dependent protein kinase VI from bovine cardiac muscle. *Mol. Cell. Biochem.* **149-150**: 29-34.
13. **Hao, B., Oehlmann, S., Sowa, M. E., Harper, J. W., and Pavletich, N. P.** (2007). Structure of a Fbw7-Skp1-cyclin E complex: multisite-phosphorylated substrate recognition by SCF ubiquitin ligases. *Mol. Cell* **26**: 131-43.
14. **Leuendorf, J. E., Osorio, S., Szewczyk, A., Fernie, A. R., and Hellmann, H.** (2010). Complex assembly and metabolic profiling of Arabidopsis thaliana plants overexpressing vitamin B(6) biosynthesis proteins. *Mol. Plant* **3**: 890-903.
15. **Spink, D. C., Wu, S. J., and Martin, D. L.** (1991). Multiple forms of glutamate decarboxylase in porcine brain. *J. Neurochem.* **40**: 1113-9.
16. **Wool, I. G., Chan, Y. L., Gluck, A., and Suzuki, K.** (1991). The primary structure of rat ribosomal proteins P0, P1, and P2 and a proposal for a uniform nomenclature for mammalian and yeast ribosomal proteins. *Biochim.* **73**: 861-70.
17. **Fatland, B. L., Ke, J., Anderson, M. D., Mentzen, W. I., Cui, L. W., Allred, C. C., Johnston, J. L., Nikolau, B. J., and Wurtele, E. S.** (2002). Molecular characterization of a heteromeric ATP-citrate lyase that generates cytosolic acetyl-coenzyme A in Arabidopsis. *Plant Physiol.* **130**: 740-56.
18. **Sygyusch, J., Beaudry, D., and Allaire, M.** (1987). Molecular architecture of rabbit skeletal muscle aldolase at 2.7-A resolution. *PNAS USA* **84**: 7846-50.
19. **(a) Heaton, D. N., George, G. N., Garrison, G., and Winge, D. R.** (2001). The mitochondrial copper metallochaperone Cox17 exists as an oligomeric, polycopper complex. *Biochem.* **40**: 743-51; **(b) Horng, Y. C., Cobine, P. A., Maxfield, A. B., Carr, H. S., and Winge, D. R.,** (2004). Specific copper transfer from the Cox17 metallochaperone to both Sco1 and Cox11 in the assembly of yeast cytochrome C oxidase. *J. Biol. Chem.* **279**: 35334-40.
20. **Long, M. C., Escuyer, V., and Parker, W. B.** (2003). Identification and characterization of a unique adenosine kinase from Mycobacterium tuberculosis. *J. Bacteriol.* **185**: 6548-55.
21. **Kumar, R. S., Hendrick, W., Correll, J. B., Patterson, A. D., Melville, S. B., and Ferry, J. G.** (2013). Biochemistry and Physiology of the beta Class Carbonic Anhydrase (Cpb) from Clostridium perfringens Strain 13. *J. Bacteriol.* **195**: 2262-9.
22. **Meyer, P., Liger, D., Leulliot, N., Quevillon-Cheruel, S., Zhou, C. Z., Borel, F., Ferrer, J. L., Poupon, A., Janin, J., and van Tilbeurgh, H.** (2005). Crystal structure and confirmation of the alanine:glyoxylate aminotransferase activity of the YFL030w yeast protein. *Biochim.* **87**: 1041-7.
23. **Kaplan, O., et al.** (2011). Heterologous expression, purification and characterization of nitrilase from Aspergillus niger K10. *BMC Biotech.* **11**: 2.
24. **Park, S., Rancour, D. M., and Bednarek, S. Y.** (2008). In planta analysis of the cell cycle-dependent localization of AtCDC48A and its critical roles in cell division, expansion, and differentiation. *Plant Physiol.* **148**: 246-58.

Supplemental Table 2. Proteins predicted to be subunits of large protein complexes with an  $R_{app} > 5$  in both biological replicates.

| Locus IDs | Protein names                                       | Function             | $M_{mono}$<br>(kDa) | $M_{app}$<br>Biol1<br>(kDa) | $M_{app}$<br>Biol2<br>(kDa) | $R_{app}$<br>Biol1 | $R_{app}$<br>Biol2 | Rel.<br>Abun.<br>Biol1 | Rel.<br>Abun.<br>Biol2 |
|-----------|-----------------------------------------------------|----------------------|---------------------|-----------------------------|-----------------------------|--------------------|--------------------|------------------------|------------------------|
| AT2G20140 | AAA-type ATPase family protein                      | Protein degradation  | 49.3                | 714.0                       | 577.0                       | 14.5               | 11.70              | 1.2                    | 1.1                    |
| AT5G16510 | ALPHA-1,4-GLUCAN PROTEIN SYNTHASE                   | Cell wall synthesis  | 38.6                | 577.0                       | 577.0                       | 15.0               | 14.96              | 7.6                    | 10.5                   |
| AT3G06650 | ATP-CITRATE LYASE B-1 (ACLB-1)                      | TCA cycle            | 65.8                | 466.3                       | 577.0                       | 7.1                | 8.77               | 11.5                   | 8.7                    |
| AT5G49460 | ATP-CITRATE LYASE B-2 (ACLB-2)                      | TCA cycle            | 65.8                | 466.3                       | 466.3                       | 7.1                | 7.09               | 7.5                    | 4.5                    |
| AT3G01500 | BETA CARBONIC ANHYDRASE 1 (CA1)                     | Calvin cycle         | 29.5                | 160.8                       | 198.9                       | 5.5                | 6.75               | 193.3                  | 235.3                  |
| AT5G14740 | BETA CARBONIC ANHYDRASE 2 (CA2)                     | Calvin cycle         | 28.3                | 246.2                       | 198.9                       | 8.7                | 7.02               | 101.8                  | 83.9                   |
| AT1G23730 | BETA CARBONIC ANHYDRASE 3 (CA3)                     | Calvin cycle         | 28.8                | 160.8                       | 198.9                       | 5.6                | 6.90               | 4.8                    | 3.1                    |
| AT1G70410 | BETA CARBONIC ANHYDRASE 4 (CA4)                     | Calvin cycle         | 28.4                | 246.2                       | 198.9                       | 8.7                | 7.01               | 4.7                    | 9.4                    |
| AT3G09840 | CELL DIVISION CYCLE 48 (CDC48)                      | Cell division        | 89.3                | 466.3                       | 577.0                       | 5.2                | 6.46               | 12.8                   | 13.9                   |
| AT1G14980 | CHAPERONIN 10 (CPN10)                               | Protein folding      | 10.8                | 55.4                        | 105.0                       | 5.1                | 9.72               | 9.4                    | 19.1                   |
| AT4G26780 | Co-chaperone GrpE family protein (AR192)            | Protein folding      | 36.1                | 304.6                       | 304.6                       | 8.4                | 8.44               | 4.7                    | 4.8                    |
| AT1G20440 | COLD-REGULATED 47 (COR47)                           | Stress response      | 29.9                | 198.9                       | 198.9                       | 6.7                | 6.66               | 220.5                  | 52.5                   |
| AT5G52310 | COLD-REGULATED 78 (COR78)                           | Stress response      | 77.8                | 577.0                       | 577.0                       | 7.4                | 7.42               | 66.3                   | 66.0                   |
| AT3G23490 | CYANASE (CYN)                                       | Secondary metabolism | 18.6                | 198.9                       | 129.9                       | 10.7               | 6.99               | 5.9                    | 11.3                   |
| AT1G35580 | CYTOSOLIC INVERTASE 1 (CINV1)                       | Major CHO metabolism | 62.8                | 466.3                       | 466.3                       | 7.4                | 7.43               | 1.6                    | 1.2                    |
| AT3G42170 | DAYSLEEPER                                          | DNA repair           | 78.8                | 714.0                       | 883.5                       | 9.1                | 11.22              | 3.2                    | 1.6                    |
| AT1G20450 | EARLY RESPONSIVE TO DEHYDRATION 10 (ERD10)          | Stress response      | 29.5                | 160.8                       | 160.8                       | 5.4                | 5.44               | 50.0                   | 24.4                   |
| AT1G20200 | EMBRYO DEFECTIVE 2719 (emb2719)                     | Protein degradation  | 55.5                | 714.0                       | 714.0                       | 12.9               | 12.85              | 1.8                    | 1.1                    |
| AT3G54400 | Eukaryotic aspartyl protease family protein         | RNA regulation       | 45.4                | 714.0                       | 714.0                       | 15.7               | 15.71              | 3.7                    | 1.5                    |
| AT2G38590 | F-box and associated interaction domains-containing | Protein degradation  | 50.3                | 376.9                       | 883.5                       | 7.5                | 17.56              | 2.8                    | 1.6                    |
| AT2G36460 | FRUCTOSE BISPHTHOSPHATE ALDOLASE 6                  | Glycolysis           | 38.4                | 714.0                       | 466.3                       | 18.6               | 12.16              | 56.3                   | 52.4                   |
| AT5G37600 | GLUTAMINE SYNTHASE (GLN1;1)                         | N-metabolism         | 39.1                | 246.2                       | 304.6                       | 6.3                | 7.79               | 11.9                   | 15.2                   |
| AT1G66200 | GLUTAMINE SYNTHASE (GLN1;2)                         | N-metabolism         | 39.2                | 304.6                       | 246.2                       | 7.8                | 6.28               | 13.9                   | 18.6                   |
| AT3G17820 | GLUTAMINE SYNTHASE (GLS1;3)                         | N-metabolism         | 38.6                | 304.6                       | 246.2                       | 7.9                | 6.38               | 14.5                   | 17.5                   |
| AT5G26710 | GLYTAMYL-tRNA SYNTHETASE (QRS)                      | Protein activation   | 81.0                | 714.0                       | 577.0                       | 8.8                | 7.12               | 1.7                    | 1.6                    |
| AT4G15802 | HEAT SHOCK FACTOR BINDING PROTEIN (HSBP)            | Protein folding      | 9.3                 | 84.9                        | 105.0                       | 9.1                | 11.24              | 19.0                   | 3.6                    |
| AT3G23990 | HEAT SHOCK PROTEIN 60 (HSP60)                       | Protein folding      | 61.2                | 577.0                       | 577.0                       | 9.4                | 9.42               | 5.7                    | 8.8                    |
| AT2G33210 | HEAT SHOCK PROTEIN 60-2 (HSP60-2)                   | Protein folding      | 61.9                | 714.0                       | 577.0                       | 11.5               | 9.32               | 5.6                    | 5.9                    |
| AT4G22670 | HSP70-INTERACTING PROTEIN 1 (HIP1)                  | Protein folding      | 46.6                | 304.6                       | 304.6                       | 6.5                | 6.54               | 6.2                    | 9.5                    |
| AT1G58220 | Homeodomain-like superfamily protein                | RNA regulation       | 86.2                | 714.0                       | 883.5                       | 8.3                | 10.25              | 2.7                    | 2.5                    |
| AT4G22485 | Lipid-transfer family protein                       | Protease inhibitor   | 68.2                | 714.0                       | 883.5                       | 10.5               | 12.96              | 2.1                    | 1.6                    |

|                  |                                                  |                       |       |       |       |      |       |      |      |
|------------------|--------------------------------------------------|-----------------------|-------|-------|-------|------|-------|------|------|
| <b>AT4G22505</b> | Lipid-transfer family protein                    | Protease inhibitor    | 55.2  | 714.0 | 883.5 | 12.9 | 16.01 | 4.8  | 3.4  |
| <b>AT4G09620</b> | Mitochondrial transcription termination factor   | Unknown               | 24.0  | 198.9 | 160.8 | 8.3  | 6.70  | 2.5  | 2.2  |
| <b>AT1G18800</b> | NAP1-RELATED PROTEIN 2 (NRP2)                    | DNA synthesis         | 29.5  | 198.9 | 198.9 | 6.8  | 6.75  | 5.3  | 2.5  |
| <b>AT3G05900</b> | Neurofilament protein-related                    | Unknown               | 73.4  | 577.0 | 714.0 | 7.9  | 9.73  | 21.9 | 11.7 |
| <b>AT3G44310</b> | NITRILASE 1 (NIT1)                               | Cyanide hydrolysis    | 38.1  | 466.3 | 714.0 | 12.2 | 18.73 | 16.0 | 25.4 |
| <b>AT3G44300</b> | NITRILASE 2 (NIT2)                               | Cyanide hydrolysis    | 37.1  | 466.3 | 714.0 | 12.6 | 19.23 | 22.8 | 23.2 |
| <b>AT3G44320</b> | NITRILASE 3 (NIT3)                               | Cyanide hydrolysis    | 38.0  | 577.0 | 577.0 | 15.2 | 15.19 | 10.7 | 9.1  |
| <b>AT5G22300</b> | NITRILASE 4 (NIT4)                               | Cyanide hydrolysis    | 38.9  | 466.3 | 883.5 | 12.0 | 22.73 | 1.4  | 1.8  |
| <b>AT1G79210</b> | Ntn-hydrolases superfamily protein               | Protein degradation   | 25.7  | 376.9 | 577.0 | 14.7 | 22.44 | 2.3  | 10.7 |
| <b>AT3G26340</b> | Ntn-hydrolases superfamily protein               | Protein degradation   | 29.5  | 466.3 | 577.0 | 15.8 | 19.58 | 5.1  | 3.5  |
| <b>AT4G31300</b> | Ntn-hydrolases superfamily protein (PBA1)        | Protein degradation   | 25.1  | 466.3 | 577.0 | 18.6 | 22.96 | 8.5  | 19.9 |
| <b>AT3G60820</b> | Ntn-hydrolases superfamily protein (PBF1)        | Protein degradation   | 24.6  | 466.3 | 577.0 | 18.9 | 23.43 | 13.4 | 17.3 |
| <b>AT4G09320</b> | NUCLEOSIDE DIPHOSPHATE KINASE 1 (NDPK1)          | Nucleotide metabolism | 18.8  | 376.9 | 466.3 | 20.0 | 24.80 | 8.1  | 3.7  |
| <b>AT2G42910</b> | Phosphoribosyltransferase family protein         | Nucleotide metabolism | 37.5  | 714.0 | 577.0 | 19.0 | 15.37 | 7.2  | 5.4  |
| <b>AT3G06930</b> | ARGININE METHYLTRANSFERASE 4B (PRMT4B0)          | Methyltransferase     | 59.7  | 466.3 | 466.3 | 7.8  | 7.81  | 1.6  | 1.8  |
| <b>AT2G38230</b> | PYRIDOXINE BIOSYNTHESIS 1.1 (PDX1.1)             | Co-factor synthesis   | 32.8  | 376.9 | 466.3 | 11.5 | 14.20 | 2.8  | 3.7  |
| <b>AT5G14800</b> | PYRROLINE-5-CARBOXYLATE                          | Amino acid metabolism | 28.6  | 714.0 | 577.0 | 25.0 | 20.17 | 3.5  | 4.0  |
| <b>AT5G11580</b> | RCC1 family protein                              | Cell division         | 60.5  | 466.3 | 577.0 | 7.7  | 9.54  | 1.3  | 1.8  |
| <b>AT5G01410</b> | REDUCED SUGAR RESPONSE 4 (RSR4)                  | Co-factor synthesis   | 33.2  | 304.6 | 246.2 | 9.2  | 7.42  | 5.6  | 13.6 |
| <b>AT3G05530</b> | REGULATORY PARTICLE TRIPLE-A ATPASE 5A (RPT5A)   | Protein degradation   | 47.5  | 577.0 | 577.0 | 12.2 | 12.16 | 1.7  | 1.8  |
| <b>AT5G15650</b> | REVERSIBLY GLYCOSYLATED POLYPEPTIDE 1 (RGP1)     | Cell wall synthesis   | 40.9  | 577.0 | 714.0 | 14.1 | 17.47 | 34.3 | 40.9 |
| <b>AT3G02230</b> | REVERSIBLY GLYCOSYLATED POLYPEPTIDE 1 (RGP2)     | Cell wall synthesis   | 40.6  | 577.0 | 883.5 | 14.2 | 21.76 | 34.4 | 39.2 |
| <b>AT5G50750</b> | REVERSIBLY GLYCOSYLATED POLYPEPTIDE 4 (RGP4)     | Cell wall synthesis   | 41.8  | 714.0 | 714.0 | 17.1 | 17.07 | 4.7  | 6.7  |
| <b>AT1G23410</b> | RIBOSOMAL PROTEIN S27A                           | Protein synthesis     | 17.7  | 714.0 | 714.0 | 40.4 | 40.43 | 2.3  | 7.2  |
| <b>AT3G13570</b> | SC35-LIKE SPLICING FACTOR 30A (SCL30A)           | RNA processing        | 30.2  | 714.0 | 883.5 | 23.6 | 29.25 | 1.8  | 2.3  |
| <b>AT4G37930</b> | SERINE TRANSYDROXYMETHYLTRANSFERASE (SHMT1)      | C1-metabolism         | 57.4  | 466.3 | 466.3 | 8.1  | 8.13  | 35.1 | 29.3 |
| <b>AT3G15390</b> | SILENCING DEFECTIVE 5 (SDE5)                     | RNA transcription     | 55.1  | 466.3 | 466.3 | 8.5  | 8.46  | 5.1  | 1.9  |
| <b>AT3G05330</b> | TANGLED                                          | Cell cycle            | 49.5  | 376.9 | 883.5 | 7.6  | 17.85 | 8.0  | 8.8  |
| <b>AT1G72050</b> | TRANSCRIPTION FACTOR IIIA (TFIIIA)               | rRNA transcription    | 46.6  | 376.9 | 466.3 | 8.1  | 10.00 | 2.8  | 1.8  |
| <b>AT1G30230</b> | TRANSLATION ELONGATION FACTOR 1B BETA (EF1B-B1)  | Protein synthesis     | 25.1  | 466.3 | 466.3 | 18.6 | 18.57 | 5.8  | 21.5 |
| <b>AT5G12110</b> | TRANSLATION ELONGATION FACTOR 1B GAMMA (EF1B-B2) | Protein synthesis     | 24.8  | 376.9 | 160.8 | 15.2 | 6.49  | 15.9 | 5.0  |
| <b>AT1G09640</b> | TRANSLATION ELONGATION FACTOR 1B GAMMA (EF1B-G1) | Protein synthesis     | 46.6  | 246.2 | 466.3 | 5.3  | 10.00 | 1.7  | 2.1  |
| <b>AT2G40660</b> | Nucleic acid-binding, OB-fold-like protein       | Protein activation    | 42.1  | 577.0 | 466.3 | 13.7 | 11.09 | 1.9  | 2.1  |
| <b>AT4G10320</b> | tRNA synthetase class I                          | Protein activation    | 135.4 | 714.0 | 883.5 | 5.3  | 6.53  | 1.9  | 1.0  |
| <b>AT5G23860</b> | TUBULIN BETA 8 (TUB8)                            | Cell organization     | 50.6  | 466.3 | 577.0 | 9.2  | 11.41 | 1.9  | 1.4  |

|                  |                                                |                     |      |       |       |      |       |      |      |
|------------------|------------------------------------------------|---------------------|------|-------|-------|------|-------|------|------|
| <b>AT5G48575</b> | Unknown protein                                | Unknown             | 11.2 | 198.9 | 304.6 | 17.7 | 27.17 | 10.6 | 13.5 |
| <b>AT1G26921</b> | Unknown protein                                | Unknown             | 5.6  | 105.0 | 304.6 | 18.8 | 54.52 | 3.2  | 4.7  |
| <b>AT1G62480</b> | Vacuolar Ca-binding protein-related            | Calcium signaling   | 16.6 | 160.8 | 160.8 | 9.7  | 9.67  | 58.9 | 12.3 |
| <b>AT1G12080</b> | Vacuolar calcium-binding protein-related       | Unknown             | 15.4 | 160.8 | 129.9 | 10.5 | 8.45  | 12.6 | 4.3  |
| <b>AT3G29340</b> | Zinc finger (C2H2 type) family protein         | RNA regulation      | 72.7 | 376.9 | 466.3 | 5.2  | 6.41  | 3.0  | 1.7  |
| <b>AT5G60160</b> | Zn-dependent exopeptidases superfamily protein | Protein degradation | 52.4 | 466.3 | 376.9 | 8.9  | 7.19  | 3.9  | 3.2  |

$M_{\text{mono}}$ , predicted mass of monomers;  $M_{\text{app}}$ , apparent mass of complexes;  $R_{\text{app}}$ , the ratio of the  $M_{\text{app}}$  to the  $M_{\text{mono}}$ , Biol1, biological replicate 1; Biol2, biological replicate 2; Rel. Abun., relative abundance.
